# Supplementary material
Source: PubMed Central journal article supplement (PMC7039075)

Figure S1. Data of exosome characterization. Transmission electron micrograph of exosomes isolated from serum. Magnification, x10,000.

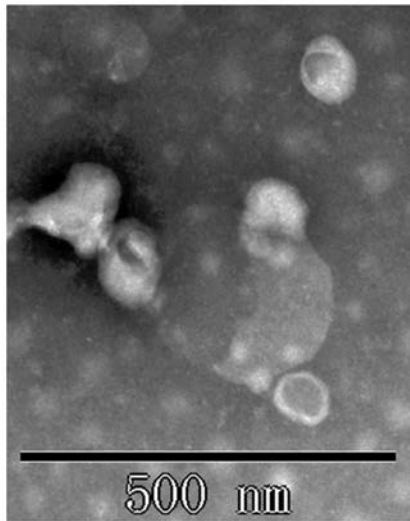

Supplement: Supplementary_Data.pdf [file Supplementary_Data.pdf]
